# Supplementary material
Source: PubMed Central journal article supplement (PMC11105800)
Supplement: NIHMS1990747-supplement-Fig_S1.pdf [file NIHMS1990747-supplement-Fig_S1.pdf]

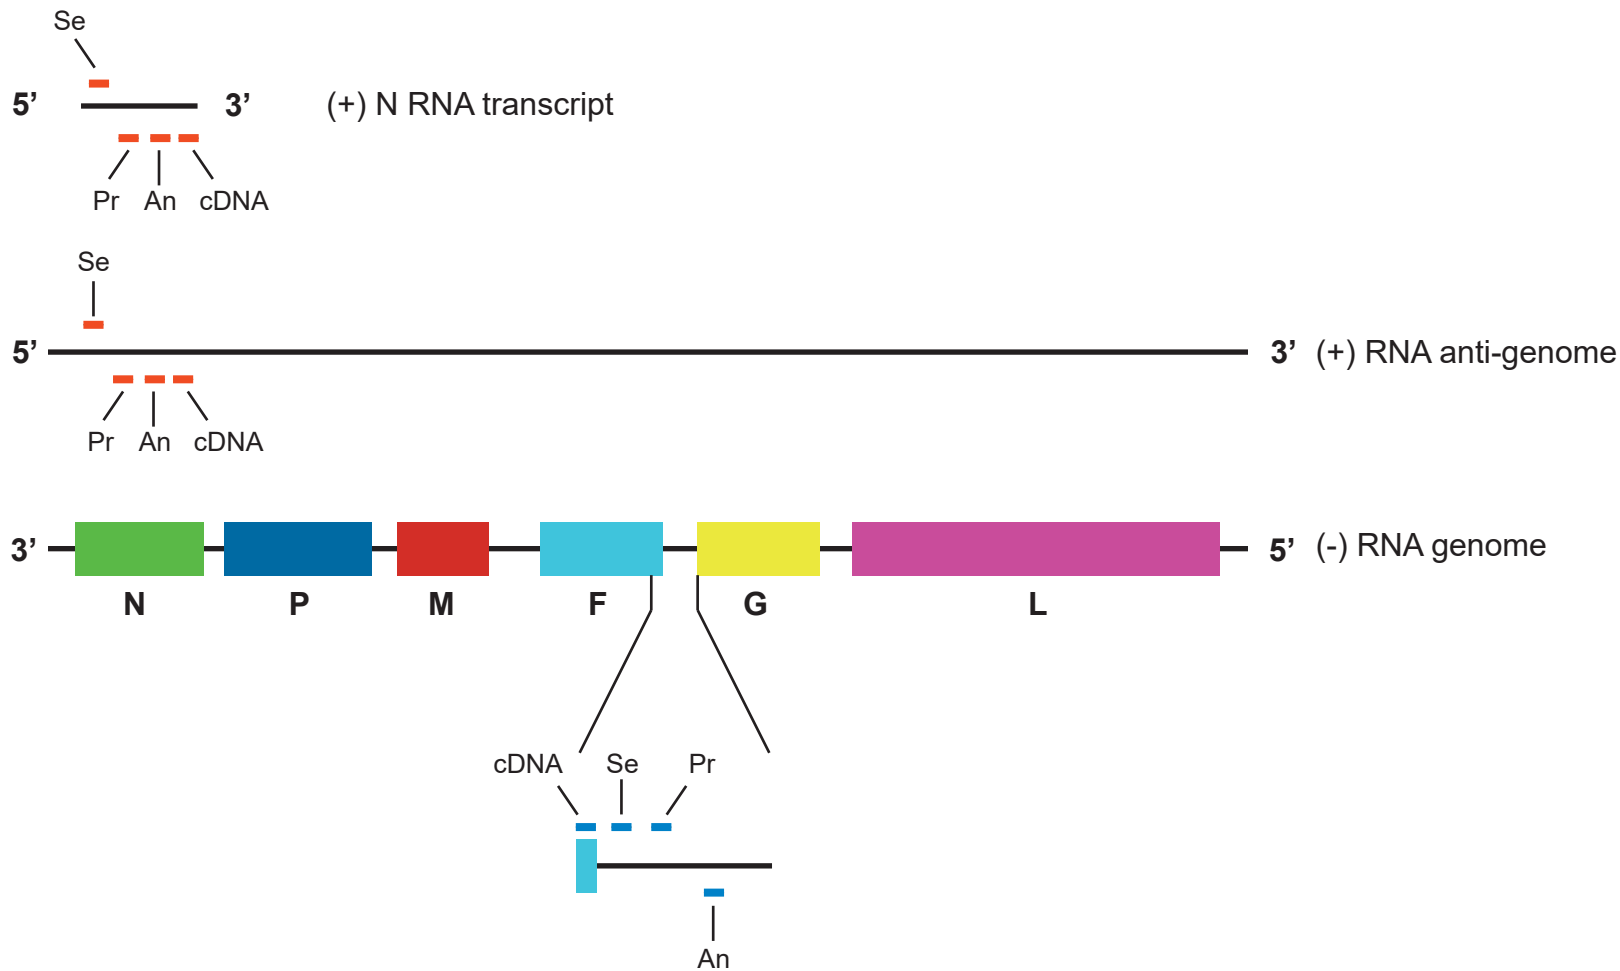

**Figure S1. Location of primer sets for qRT-PCR.** Diagram shows CedV negative sense genome with colored blocks indicating the location of each viral gene. Horizontal lines above the genome indicate the positive sense *N* RNA transcripts and full-length anti-genomes, which are amplified and detected by the *N* qRT-PCR primer set (red line segments; the qPCR amplicon size is 149 nucleotides). Horizontal line below the genome is an enlargement of the *F-G* intergenic region, showing the location of the *F-G* qRT-PCR primer set (cyan line segments), which amplifies and detects only negative-sense genomes (qPCR amplicon size is 94 nucleotides). Note that the indicated sizes and positions of primers are approximate and not to scale. See *Materials and Methods* for primer sequences. Se, sense primer; Pr, TaqMan probe; An, antisense primer; cDNA, cDNA primer for given probe set.
