# Supplementary material
Source: PubMed Central journal article supplement (PMC11105800)
Supplement: NIHMS1990747-supplement-Fig_S2.pdf [file NIHMS1990747-supplement-Fig_S2.pdf]

Mock-infected (h)

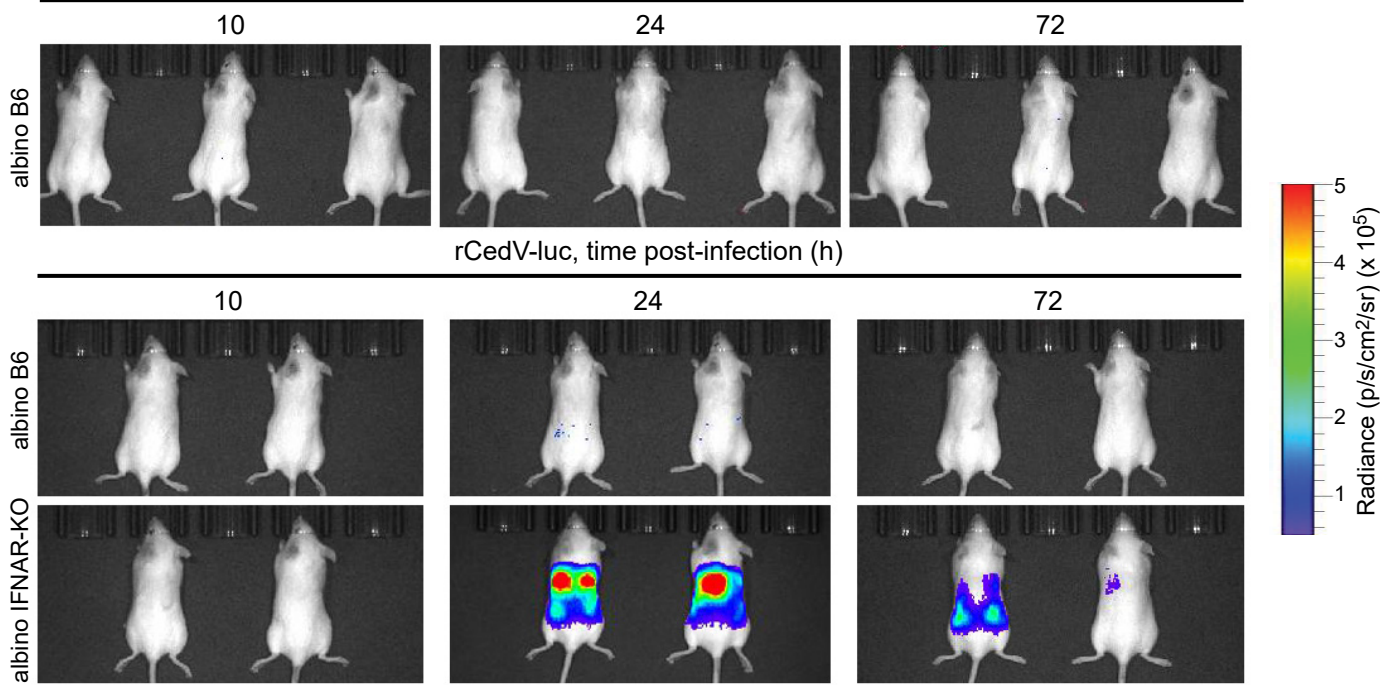

**Figure S2. Bioluminescence imaging of mock-infected and rCedV-luc-infected animals.** BLI data (pseudocolor intensity) overlaid on brightfield images (dorsal view) at the indicated time points for those animals that were not shown in Fig 1A. The same animals in the same right-to-left order are shown at each time point.
