# Supplementary material
Source: PubMed Central journal article supplement (PMC11105800)
Supplement: NIHMS1990747-supplement-Fig_S3.pdf [file NIHMS1990747-supplement-Fig_S3.pdf]

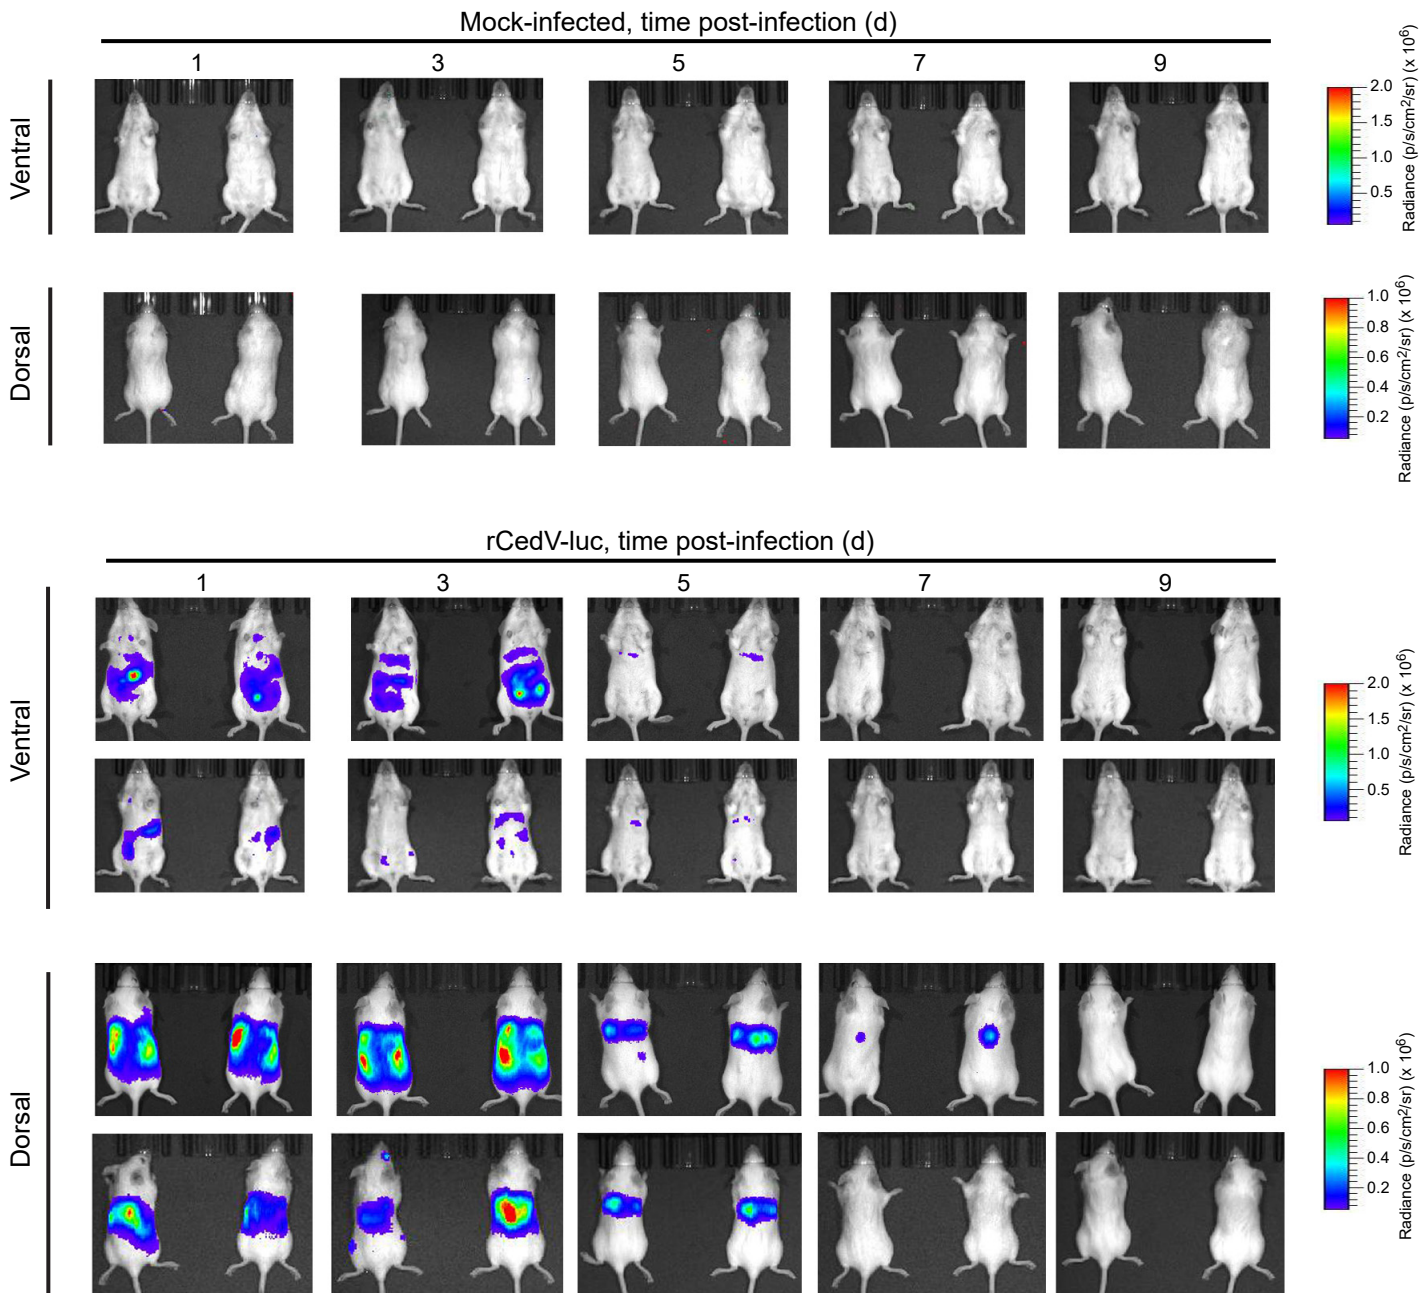

**Figure S3. Bioluminescence imaging of all animals quantified in Fig. 2B.** BLI data (pseudocolor intensity) overlaid on brightfield images of animals (n=2 mock infected female IFNAR-KO; n=4 rCedV-luc-infected female IFNAR-KO) analyzed at the indicated time points. The same animals in the same right-to-left order are shown at each time point. .
